# Supplementary material
Source: HighWire-hosted journal article supplement (https://gut.bmj.com/content/71/10/2011)
Supplement: inline-supplementary-material-6 [file inline-supplementary-material-6.pdf]

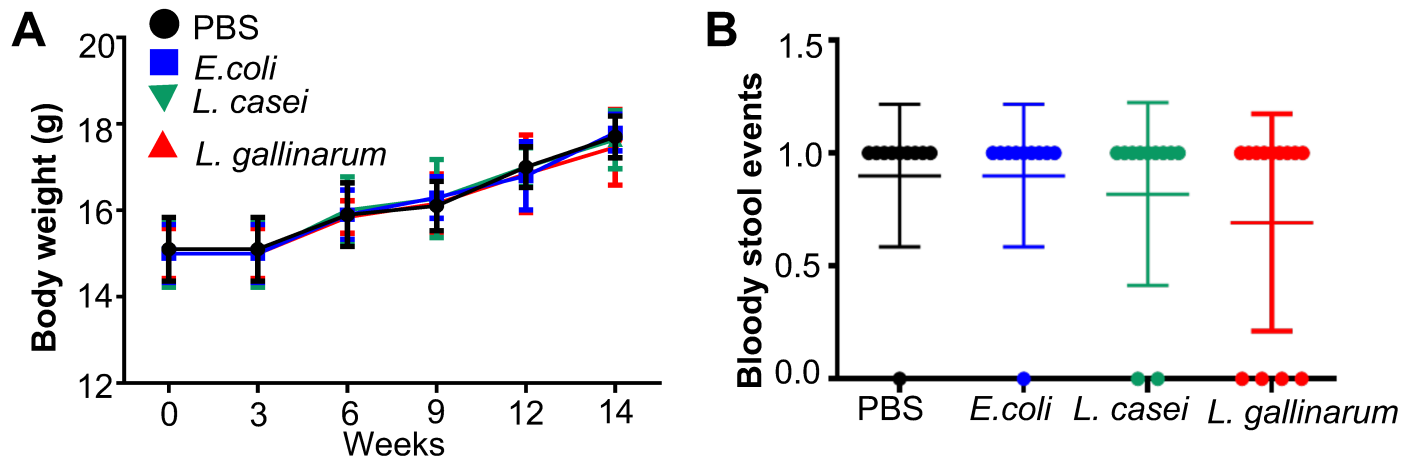

**Supplementary Figure 4. Physiological features of female AOM/DSS-induced CRC mice before sacrifice. (A)** There was no significant difference in body weight among four groups of mice during the period of gavage. **(B)** There was no significant difference in bloody stool number and incidence among four groups of mice during the period of gavage.
