# Supplementary material
Source: HighWire-hosted journal article supplement (https://gut.bmj.com/content/71/10/2011)
Supplement: inline-supplementary-material-11 [file inline-supplementary-material-11.pdf]

Figure S6

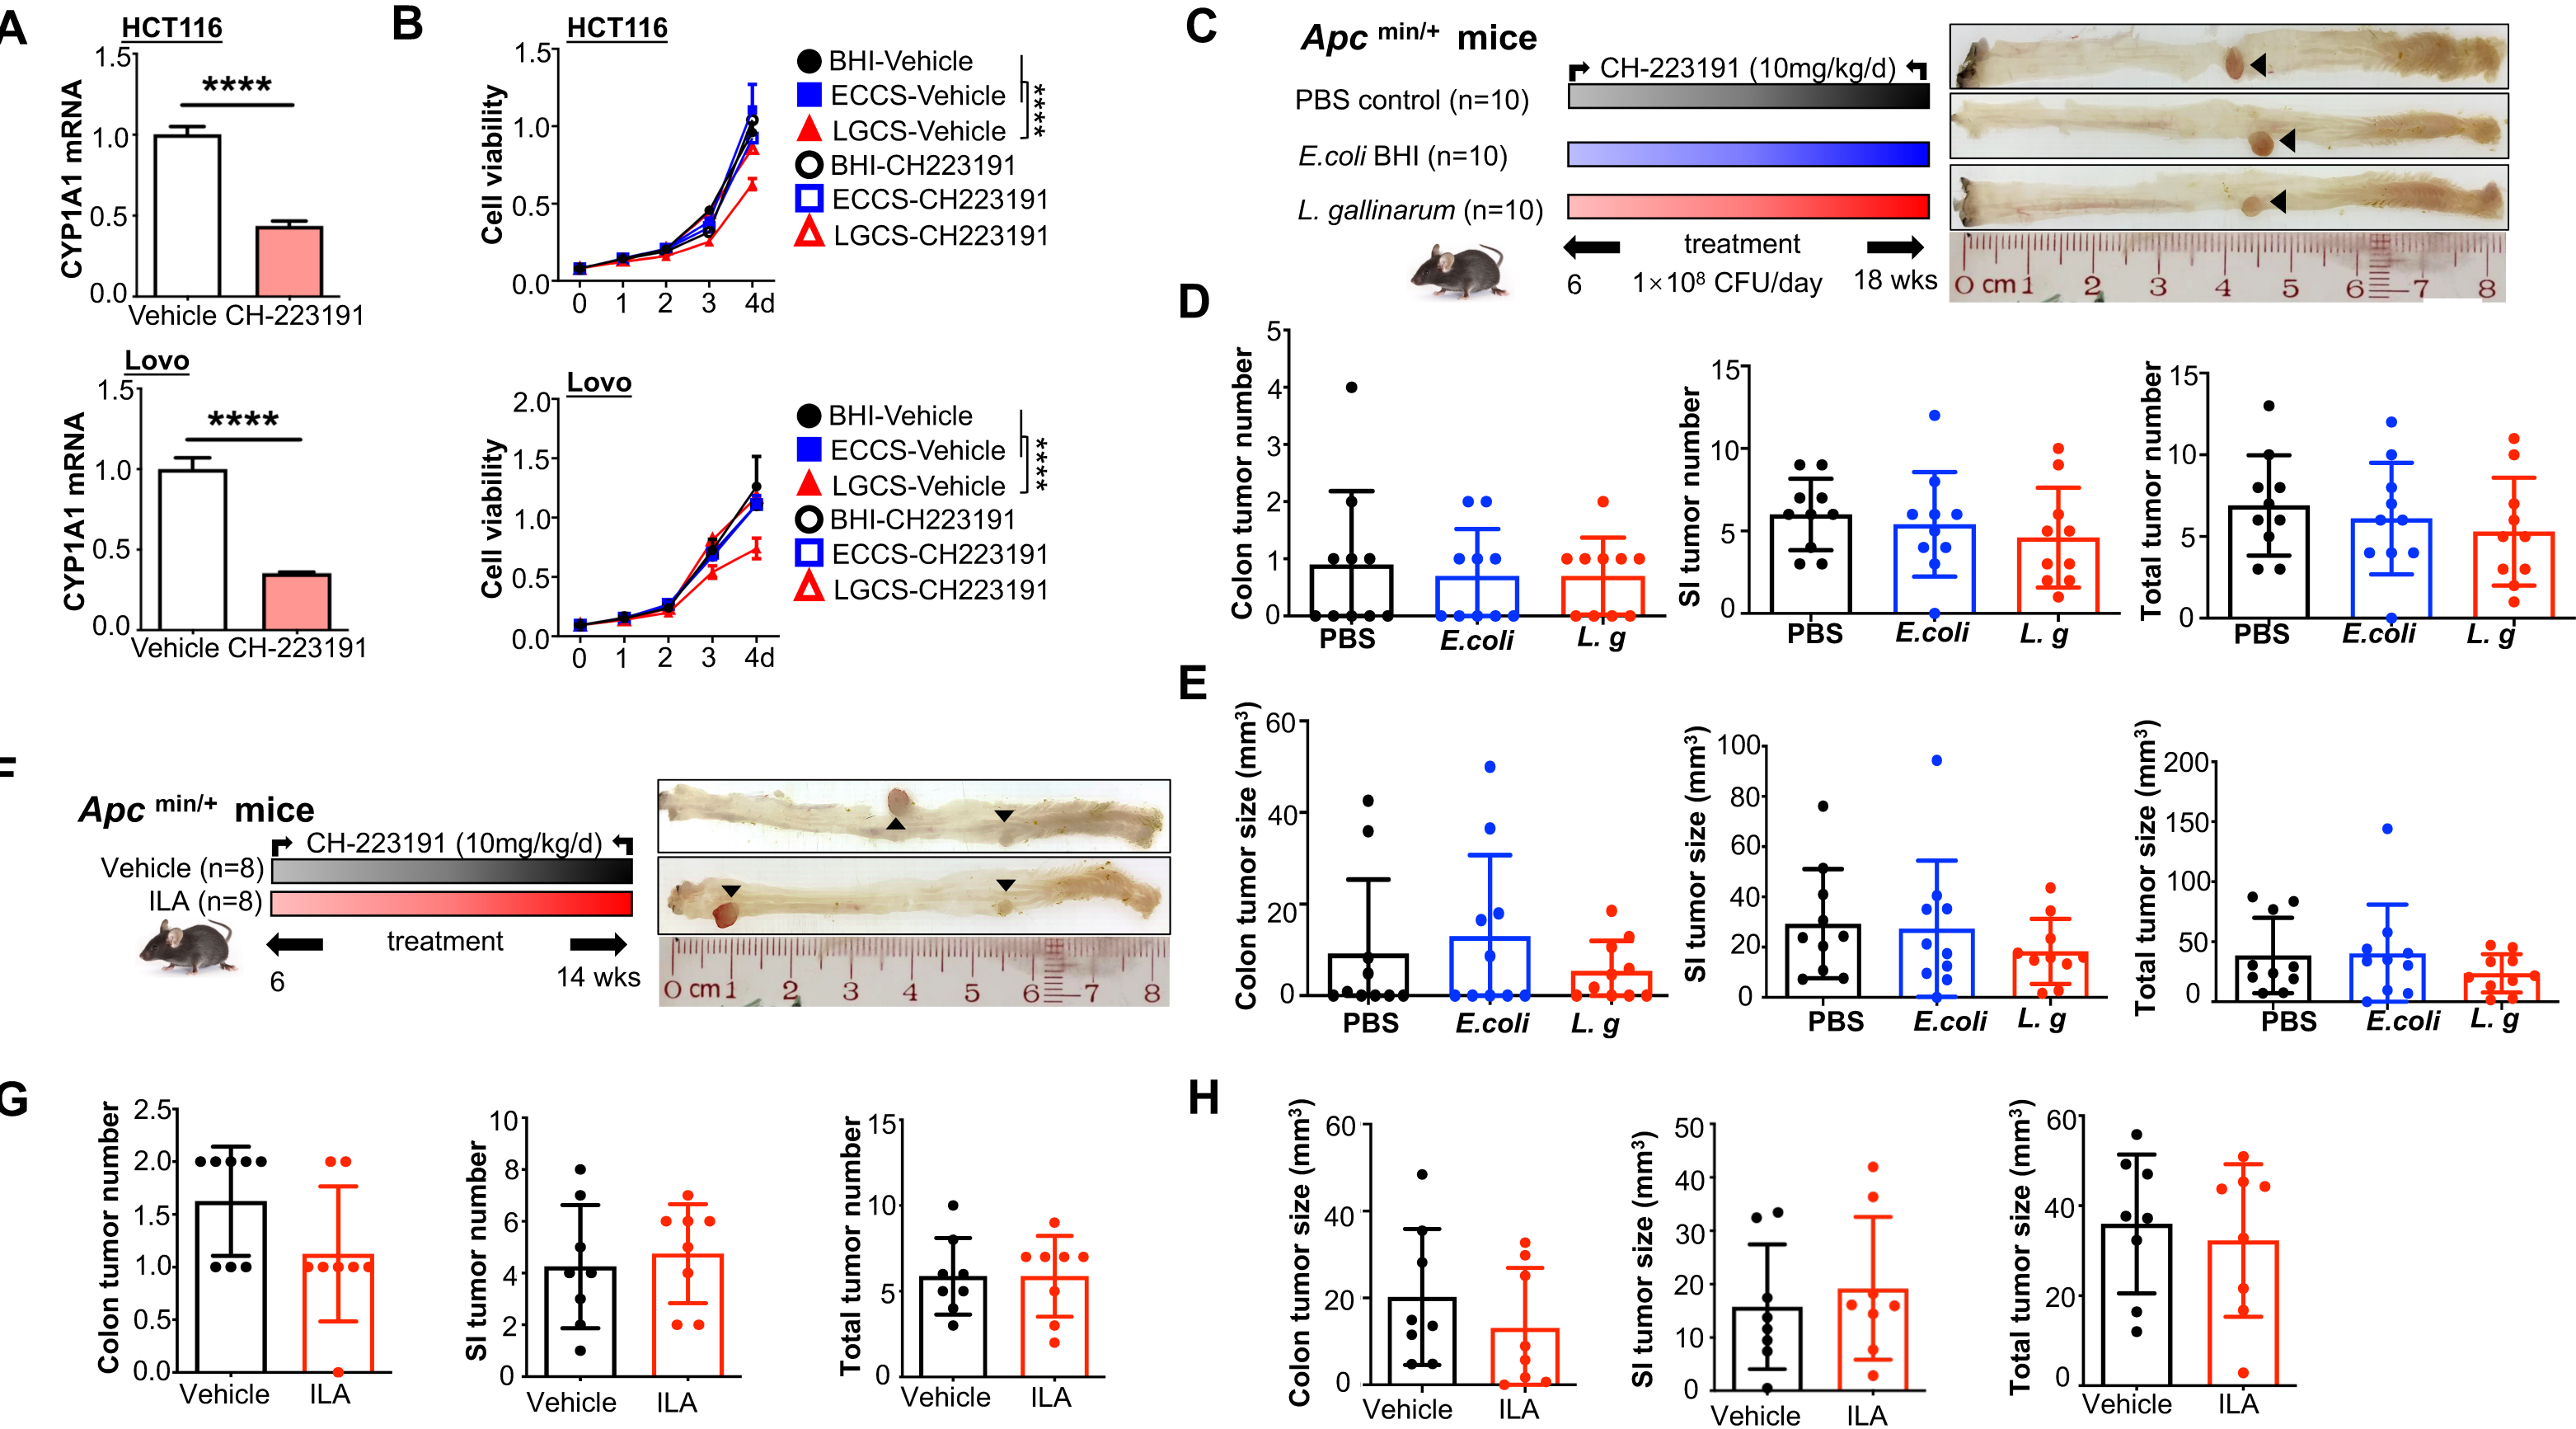

**Supplementary Figure 6. Aryl hydrocarbon receptor (AhR) specific antagonist (CH-223191) partially abolishes the tumor-suppressive effect of *L. gallinarum* and ILA.** (A) The transcription of AhR was significantly suppressed by CH-223191 (100nM). (B) Pre-treat CRC cells with CH-223191 (100nM) for 12 hours abolished the anti-proliferation effect of LGCS. (C) Schematic diagram showing the experimental design, timeline and representative macroscopic images of colons from female *Apc*<sup>Min/+</sup> mouse model. (D) Colon, small intestinal and total tumor number (colon + small intestinal) in female *Apc*<sup>Min/+</sup> mice under different treatments. (E) Colon, small intestinal and total tumor size (colon + small intestinal) in female *Apc*<sup>Min/+</sup> mice under different treatments. (F) Schematic diagram showing the experimental design, timeline and representative macroscopic images of colons from male *Apc*<sup>Min/+</sup> mouse model. (G) Colon, small intestinal and total tumor number (colon + small intestinal) in male *Apc*<sup>Min/+</sup> mice under different treatments. (H) Colon, small intestinal and total tumor size (colon + small intestinal) in male *Apc*<sup>Min/+</sup> mice under different treatments. Each black triangle indicates one tumor location. *P*-values are calculated by one-way ANOVA or two-way ANOVA where appropriate. \*\*\*\**p* < 0.001. *L.g.*, *L. gallinarum*; SI, small intestine; ILA, indole-3-lactic acid.
