# Supplementary material
Source: HighWire-hosted journal article supplement (https://gut.bmj.com/content/71/10/2011)
Supplement: inline-supplementary-material-12 [file inline-supplementary-material-12.pdf]

# Figure S5

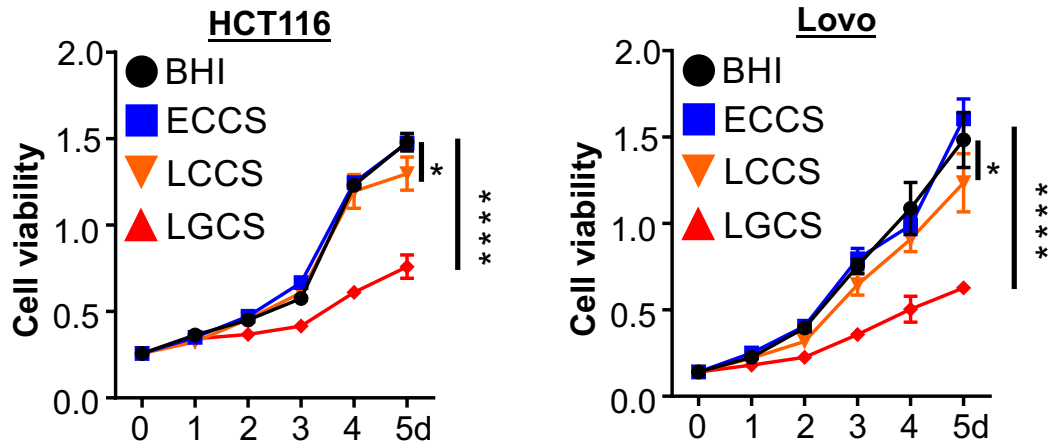

**Supplementary Figure 5. *L. gallinarum* supernatant inhibits the viability of colon cancer cells.** 20% of LGCS and LCCS suppressed the viability of CRC cells. *P*-values are calculated from two-way ANOVA. \**p* < 0.05, \*\*\*\**p* < 0.0001.
